# Supplementary material for: Localized epigenetic silencing of a damage-activated WNT enhancer limits regeneration in mature Drosophila imaginal discs
Source: eLife journal article supplement (doi:10.7554/elife.11588), 2016-02-03
Supplement: supp [file elife-11588-supp-v1.zip]

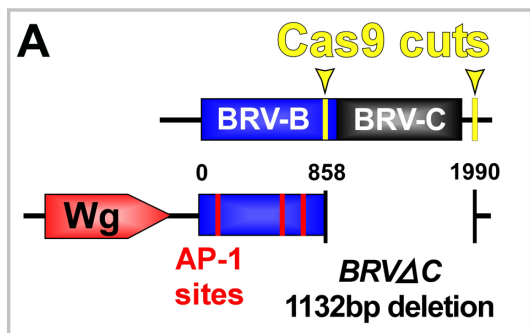

**B**

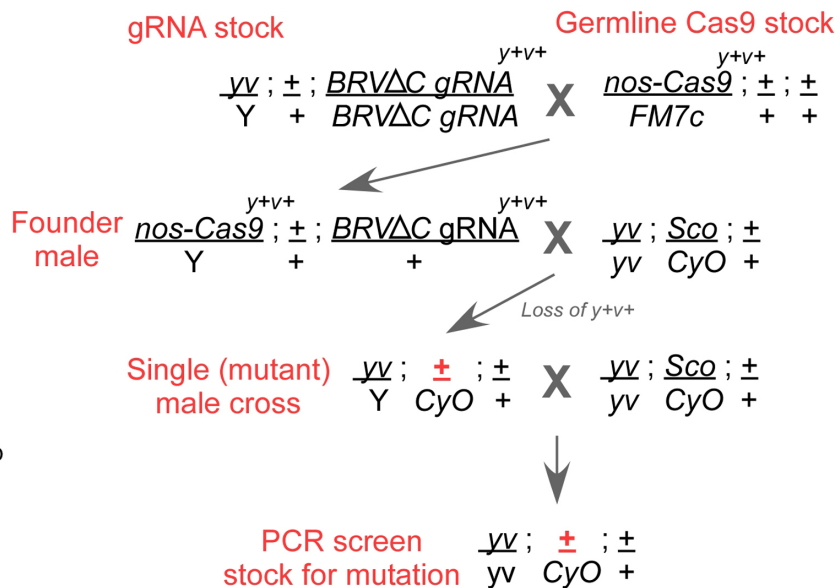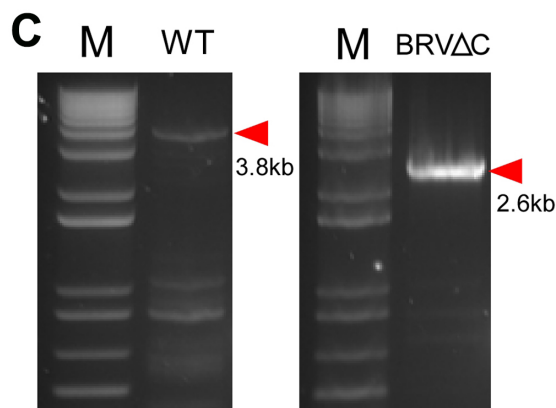

**D**

5'

Parental: ggcattgcctggccttctgctattgttgctgggctctgctggctgacgcttagtcataaaatattccattttatttcgtatcttttatctgtt...

BRV $\Delta$ C: ggcattgcctgTCCC-----

986 bp

Parental: ...ccacaacgcaatgcaccaagttttatgatatcctgaaggaagtgaatatgatattatgaatcgcccgtcagacagttggg

BRV C: ...-----gttggg

3'

BRV-C
