# Supplementary material for: Localized epigenetic silencing of a damage-activated WNT enhancer limits regeneration in mature Drosophila imaginal discs
Source: eLife journal article supplement (doi:10.7554/elife.11588), 2016-02-03
Supplement: supp [file elife-11588-supp-v1.zip]

A

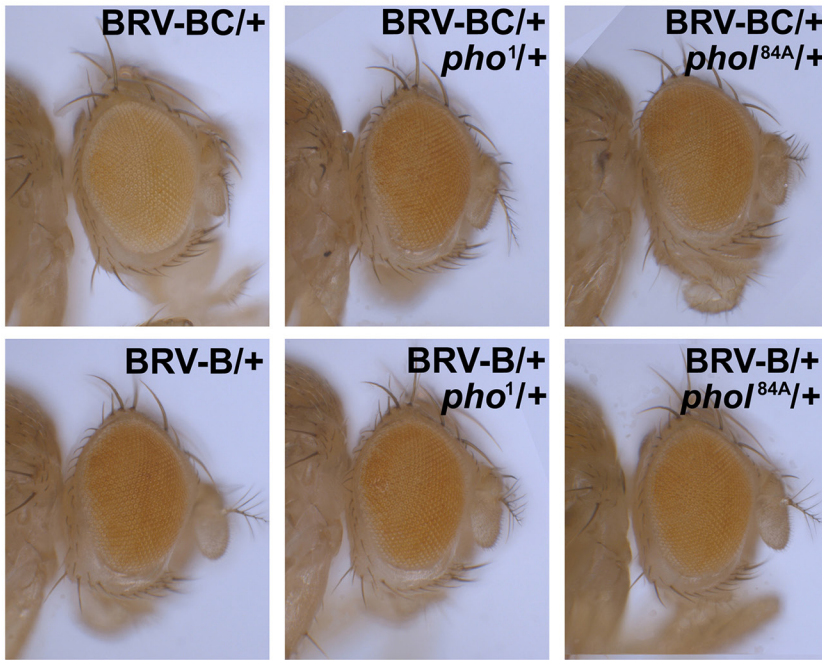

C

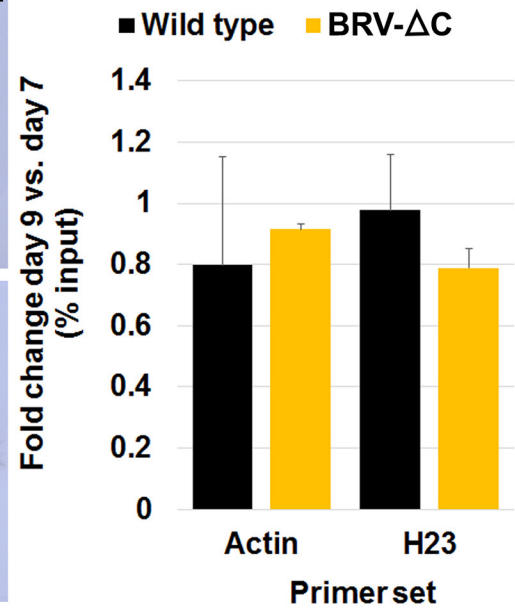

B

BRV-C<sup>0-183</sup>

TTTTATCTGTTTTTCGGACCGCTGTAT**GTGAAACAAT**TTCTCACACAACCTTCAATTTGC  
**CGAGCGCTCG**AGCATGGATATTTTGTTCGGAGCA**CACCTT**GCGTGTGGTCTCTTAAT  
 TTGCCCCGATGCCCCAGCGATTGAATCCCGAAACTCGAATCGGTGAATCAAATGAAACT  
 CAATTA

BRV-C<sup>184-441</sup>

AGC**CGCCTC**CGTTAGACAAA**ACGCCGC**GTGT**CAAAAACAAT**CGTT**TTTTCT**CCCCAGCGAA  
 CCTTTTGCCTGGGAAGATCGGT**GCAC****TCG**ACAAAAAGTTGAACCTTCATCAATAACATT  
 CAGTGAAATGCTTAAAGTAAACTGTTTTATTTTGGGCAAACAACCTTTTAACACATTTT  
 GTTAATTTGAAAGGACGTTAG**ATGGTTGCA**ATTTCTCTGGGTGTACGATCATTGCCTA  
 T**GAGGCGCG**TCAT**TTTT**CATT

BRV-C<sup>442-698</sup>

TCCATTTTCG**TTTTCT**GATTTTCAGCCGGGCTA**GAGAG**CAACTTGGCCTGACTGTGGGGCCT  
 TTGATGTCATAATTCATGTATATTAACATCAATAAAGCGAATGCAACTTTATGCCACA  
 GTT**CACCCCGA**ACTGGGACTC**CTTGTT****CGCC**CGCTGTCCATCCGTTTGTCTGCAACTCCG  
 TCTGCGTTTTCGGT**TTTTCT**CGTCTTTGCGTCT**TGGCGATCGGCGGGAGT**CAAATCGTTTCT  
 GGCTCTTCTAGCCGGGCTTTT

BRV-C<sup>699-989</sup>

GGTATTTAGTGCACTTAATCTACGCCAAAAGTACCAACTAAGCGAGATAAATAGCTGCA  
 AAATAAACTAAGTCAGTGCGATG**GAGCGCCATTT****TCGC**AGCATTGGGATGAGATGGGTTA  
 CTGCTCGGGTCTCGGCGTGGTCTGGGATGGGGTTTGGTTTGGGTTTGGGATTGGGATT  
 GGAATTGCGAGATTGGGATATTCCTGTGTCCAGTGTGCGGTGTACAGT**GAAATGGCTA**  
**TAAATCGG**CACGAC**TTTTCA**ATAAATGTTGACAACACAGCGAGCCACAACG

Pho(2) Zeste(3) Grh(5) SP1(5) DSP1(6) GAGA(1)
