# Supplementary material for: Localized epigenetic silencing of a damage-activated WNT enhancer limits regeneration in mature Drosophila imaginal discs
Source: eLife. 2016 Feb 3;5:e11588. doi: 10.7554/eLife.11588 (PMC4786413; doi:10.7554/eLife.11588)
Supplement: Supplementary file 1. — (A) Primers used for cloning transgenic reporters of the BRV118 enhancer and all derived constructs. (B) Primers used for qPCR analysis of ChIP DNA (Figure 7F and Figure 7—figure supplement 2C). DOI: http://dx.doi.org/10.7554/eLife.11588.026 [file elife-11588-supp1.xlsx]

## Sheet: Supplemental file 1A
Enhancer fragment		Forward primer	Reverse Primer
BRV118-GFP		AACAGATCT GCGGCCGC CGGATCCTCGAGTCCAGACAAAA	CCTCGAGCC GCGGCCGC CGTTGTGGCTCGCTGTGTTGTCA
BRV-A		AACAGATCT GCGGCCGC CGGATCCTCGAGTCCAGACAAAA	CCTCGAGCC GCGGCCGC CAATGCGAGGTTTCTGTGGTGCG
BRV-B		AACAGATCTGCGGCCGCCACTTTGTCCTAACGTTGACATCTTG	CCTCGAGCCGCGGCCGCGATACGAAATAAAATGGAATATTTTATGACT
BRV-C		AACAGATCT GCGGCCGC TTTTATCTGTTTTCGGACCGCTGTATG	CCTCGAGCC GCGGCCGC CGTTGTGGCTCGCTGTGTTGTCA
BRV-AB		AACAGATCT GCGGCCGC CGGATCCTCGAGTCCAGACAAAA	CCTCGAGCCGCGGCCGCGATACGAAATAAAATGGAATATTTTATGACT
BRV-BC		AACAGATCTGCGGCCGCCACTTTGTCCTAACGTTGACATCTTG	CCTCGAGCC GCGGCCGC CGTTGTGGCTCGCTGTGTTGTCA
BRV-BC		AACAGATCT GCGGCCGC CACTTTGTCCTAACGTTGACATCTTGC	CCTCGAGCC GCGGCCGC TAATTGAGTTTCATTTGATTCACCGATTCGAG
0-183
BRV-BC		AACAGATCT GCGGCCGC CACTTTGTCCTAACGTTGACATCTTGC	CCTCGAGCC GCGGCCGC AATGAAAATGGACGCCGCCTC
0-441
BRVBC		AACAGATCT GCGGCCGC CACTTTGTCCTAACGTTGACATCTTGC	CCTCGAGCC GCGGCCGC AAAAGCCCGGCTAGAAGAGCC
0-698
BRV-B3		AACAGATCT GCGGCCGC AAGCGGCATTCAAAAAGGCCG	CCTCGAGCCGCGGCCGCGATACGAAATAAAATGGAATATTTTATGACT
BRV-B3-Wg	Wg coding	GAACTCACACCCATATG GATATCAGCTATATCTTCGTCATCTGC	ATCCTCTAGTCCTAGG GTAATTTTTTACTCATTGTCGT
BRV-B-Myc	Myc coding	GAACTCACACCCATATG TAC CCA TAC GAT GTT CCA GAT TAC GCT GCCCTTTACCGCTCTGATCCG	ATCCTCTAGTCCTAGG CTATCCACTAACCGAGCGCGATT
		Primers used for sequential deletion		Deleted nucleotides
BRV-B	Site 1	AATCAGTA_TTCAGTTTCAGGAATTCACGAAATTCAT	AAACTGAA_TACTGATTCTGTGAAGCATCAGATGAAA	GCTGACTCACTGCGA
deltaAP1
	Site 2	ATTTCTCA_TTCCTTCCGCTGGGAGAATGAATC	GGAAGGAA_TGAGAAATTCAAGGGCACGTGGAG	GAGTCTGACTAATAC
	Site 3	TGCTGGCT_AATATTCCATTTTATTTCGTATCTTTTATCTGTTTTCGGACC	GGAATATT_AGCCAGCAGAGAGCCCAGCAA	GACGTTTAGTCATAA
BRV-B	Site 1	TAGACAAA_TCAAAACAATCGTTTTTTCTCCCAGCG	TGTTTTGA_TTTGTCTAACGGAGGCGGCTTAATT	ACGCCGCGTG
deltaBrk
	Site 2	GCCTATGA_TTTTCATTTCCATTTCGTTTTCGATTTCAGCC	AATGAAAA_TCATAGGCAATGATCGTACACCCAGA	GGCGGCGTCCA
Primers include 16 nucleotides complementarity required for Infusion cloning strategies (see Clontech website for details).

## Sheet: Supplemental file 1B
Primer set	Forward Primer	Reverse Primer
1	AGGATTTTGGCCCATTCTTT	ATCGCACACGTTGAAGATGA
2	CAGGCATCAGAATCGTAGCA	CCAATGGCCAACTTCAGATT
3	GAAAAGCCGCAAATGAAAAA	TTTCCAGGGGCTTATGTGTC
4	CGCGCACAACAATTACAAAC	TGCCACGTTGTTGCAGTTAT
5	CTCTGCCTGCTGCAAGTATG	GAGCCGATCTGTTGCAATTT
6	ATTTCCGCATGAGACCAAAG	CTGACCAGCTCCAGGATAGC
7	GTCCAACTTTATCGGCGTGT	GCACTTTGTCAATCGCTGAA
A1	TTTGGGAACTTTGATGGGTTATCTGC	GGCTGAATATGGATGGATGGCTAC
A2	ATCCATCCATATTCAGCCAGGCAC	AATGGAAAGGAAGGCACCACTG
B1	ACAGAAACCTCGCATTGCACTTTG	TGCGAATTTGGAGTGATGGGTG
B2	ACCCATCACTCCAAATTCGCAC	TCCTGTCGCAATACCTTCCTATCC
B3	GAGCCCCATGAATCCACAAC	TGTGCTACCAGCTCCGTATT
B4	AACGATGAAGCGAACTCAGACC	CCAGGCAATGCCAACAACAAACTATTAC
B5	GTAATAGTTTGTTGTTGGCATTGCCTGG	AGCCCAGCAACAATAGCAGAAAG
C1	TTCGGACCGCTGTATGTGAAAC	TCGGCAAATTGAAGGTTGTGTGAG
C2	CACAACCTTCAATTTGCCGAGC	GGCAAATTAAGAGACCACACGCAAG
C3	AATAAGCGAATGCAACTTTATGCCACAG	AGTTGCAGACAAACGGATGGAC
C4	TCCATCCGTTTGTCTGCAACTC	GCTAGAAGAGCCAGAAACGATTTGAC
C5	ATAAACTAAGTCAGTGCGATGGAGC	CAGTAACCCATCTCATCCCAATGC
8	CATAACTTGTTGGCGTGTCG	TTGGTGTAGCTCGGTTTGTG
9	TTTCCCTTTCGTTACGCATT	TTCTCCATTTTTCCCTGTGC
10	TCACGTCAAATCGCATCAGT	TTATTTTGGGGCATGCACTT
11	GCTGGCTCCTTTTCATGTTC	CCGATCGTTCGACACTTTTT
12	GATCGCTACTGGGAAGTGGA	TCGCCCATCTGAATCTTTTT
13	GATACTCCCAATCCCAGCAA	TCAAGCGGTTTGCATTTGTA
Act5C	CACGGTATCGTGACCAACTG	GCCATCTCCTGCTCAAAGTC
H23 heterochromatin	CCAAGTTGGCCAGTTTTGAT	AGTTCAAGCCCGGGTATTCT
