# Supplementary figures and images for: Localized epigenetic silencing of a damage-activated WNT enhancer limits regeneration in mature Drosophila imaginal discs
Source: eLife journal article supplement (doi:10.7554/elife.11588), 2016-02-03

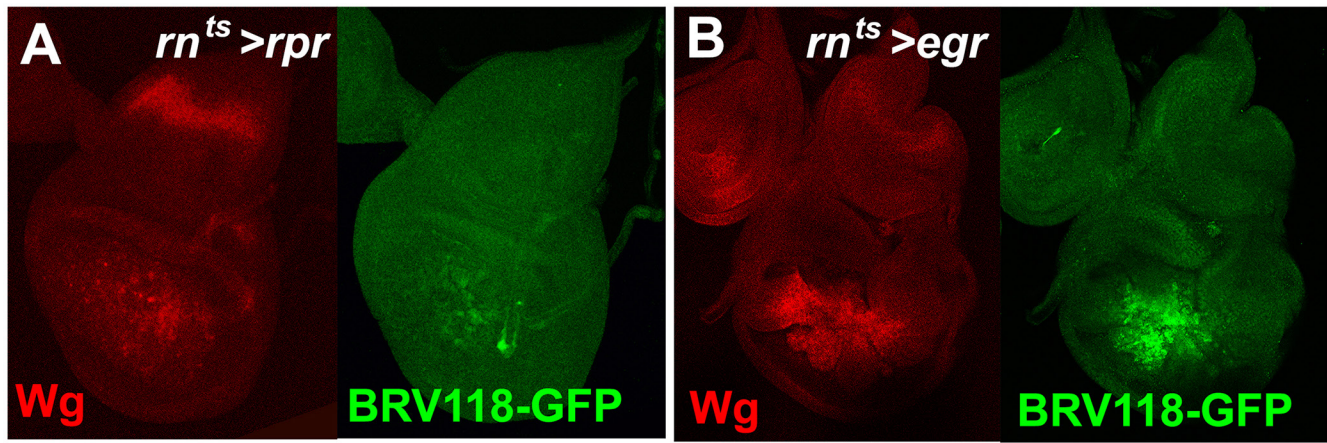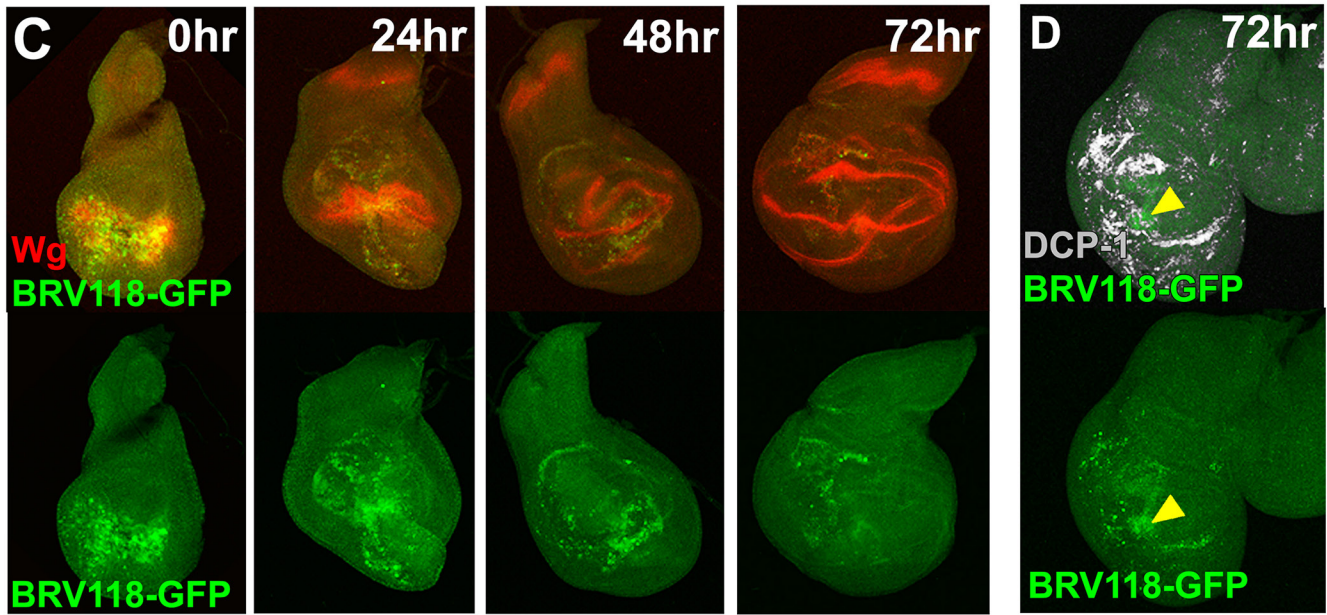

Supplement: supp [file elife-11588-supp-v1.zip]

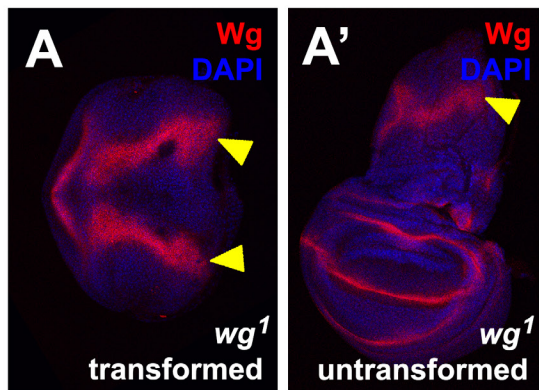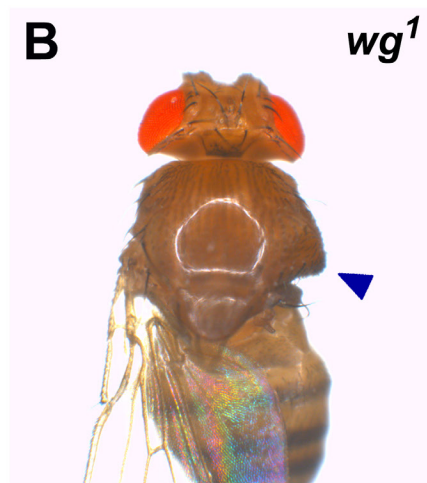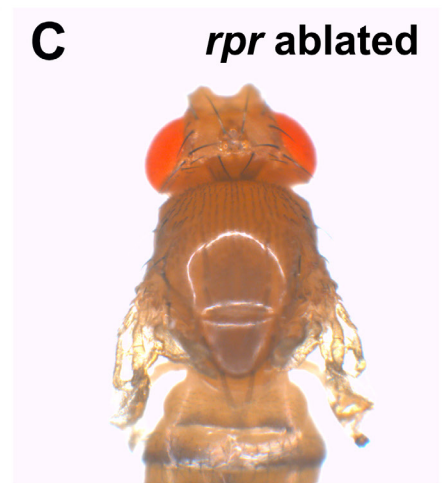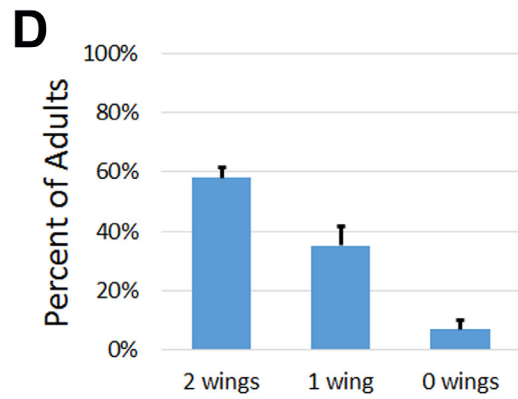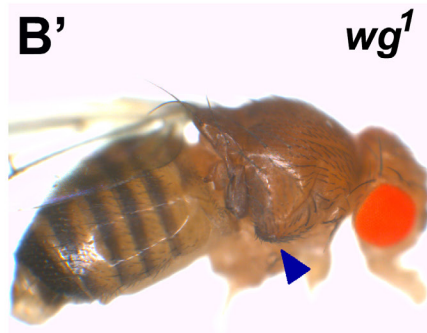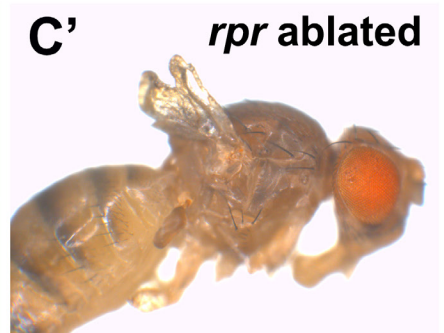

Supplement: supp [file elife-11588-supp-v1.zip]

**SP60125**  
**JNK inhibitor**

**DMSO**

**Undamaged**

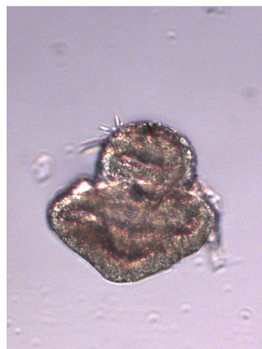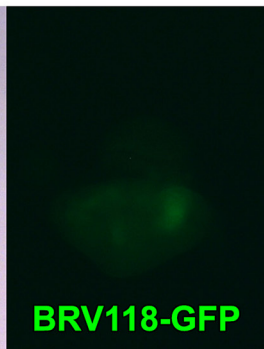

**Damaged**

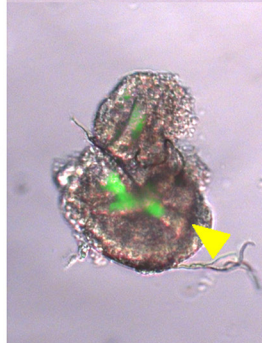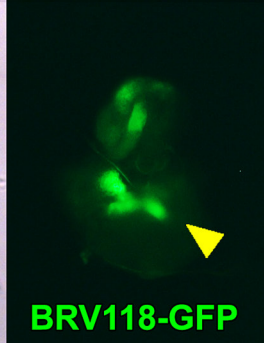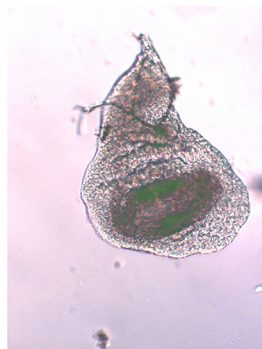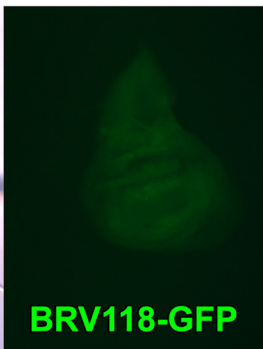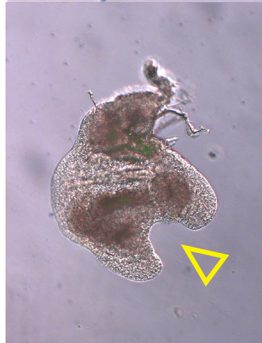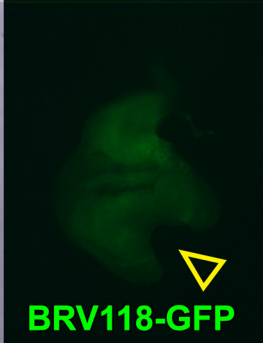

Supplement: supp [file elife-11588-supp-v1.zip]

**A****Day 7**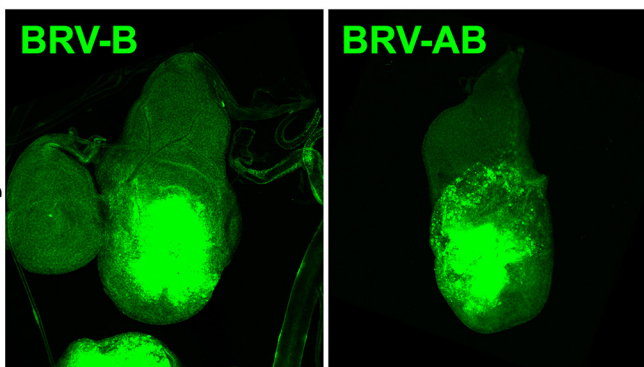**Day 9**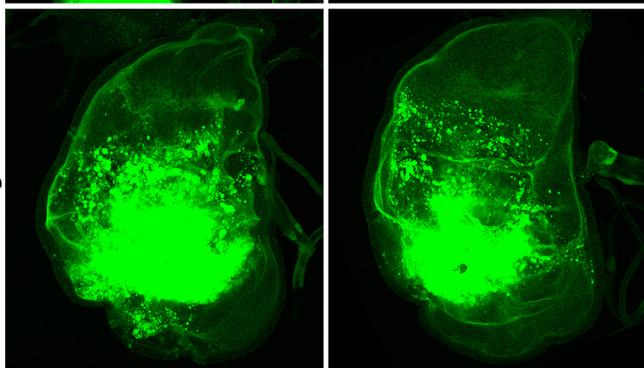**B****Brk sites**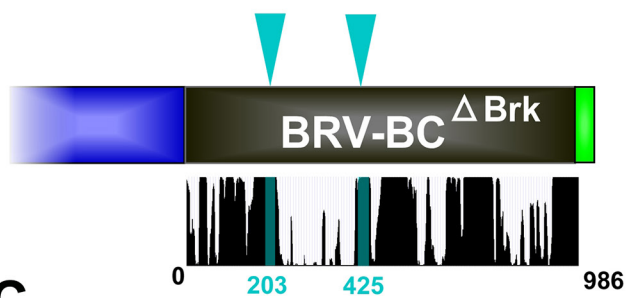**C****Day 9**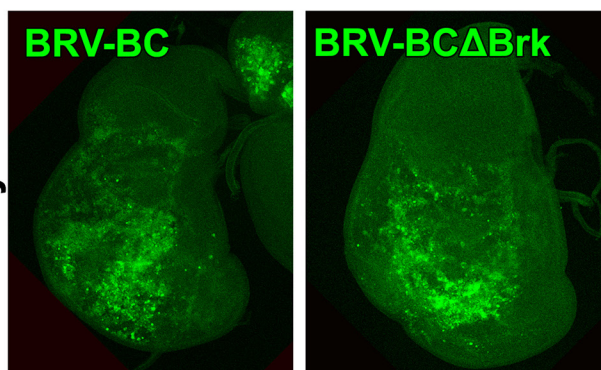

Supplement: supp [file elife-11588-supp-v1.zip]

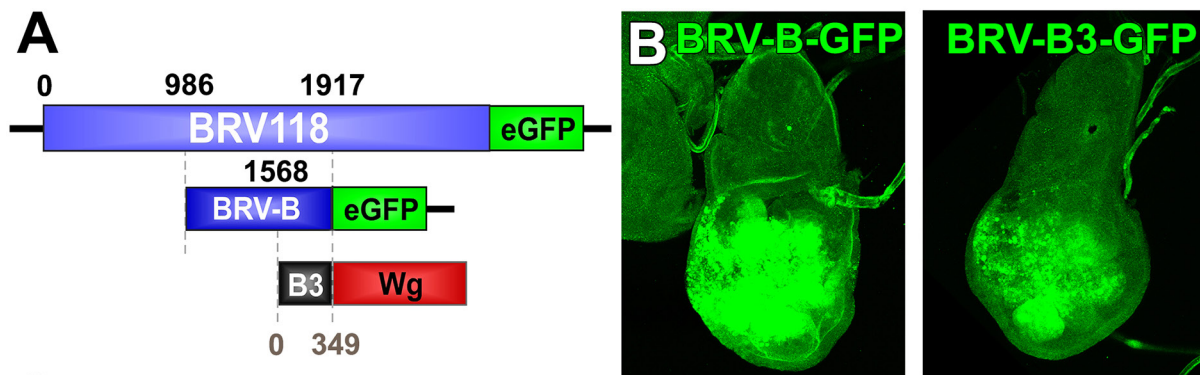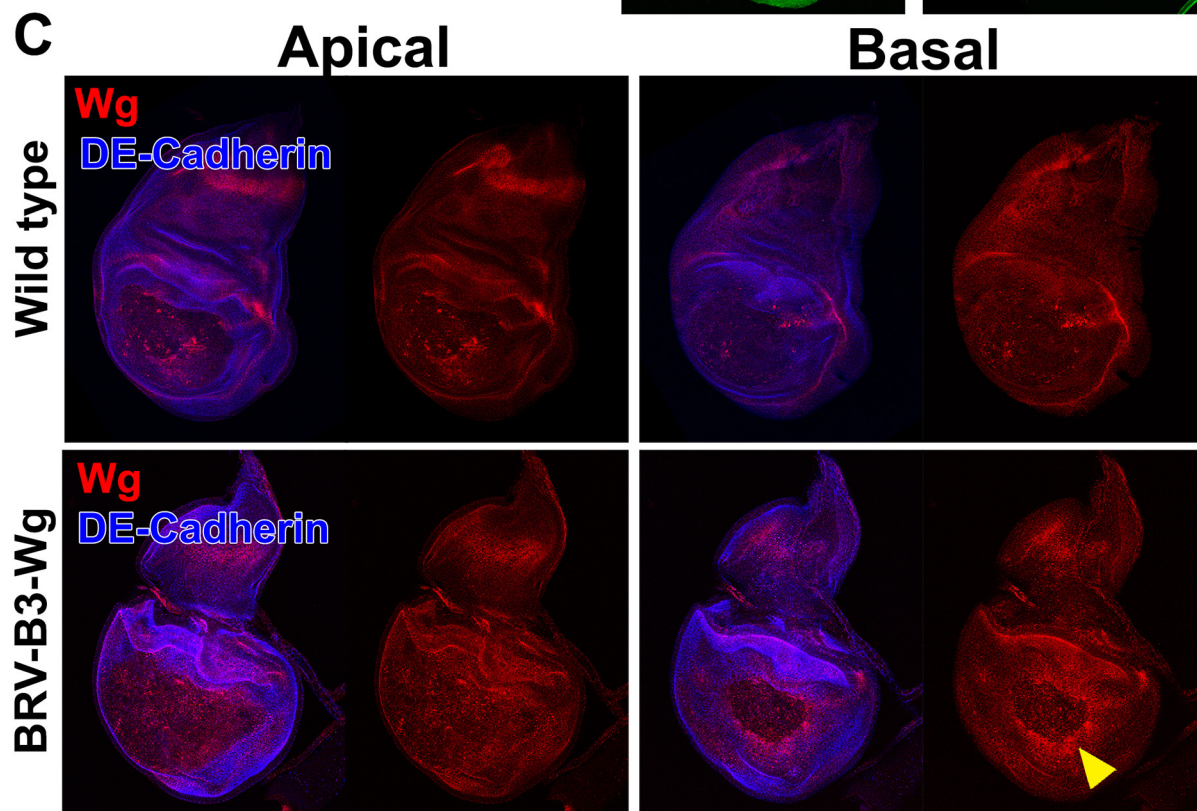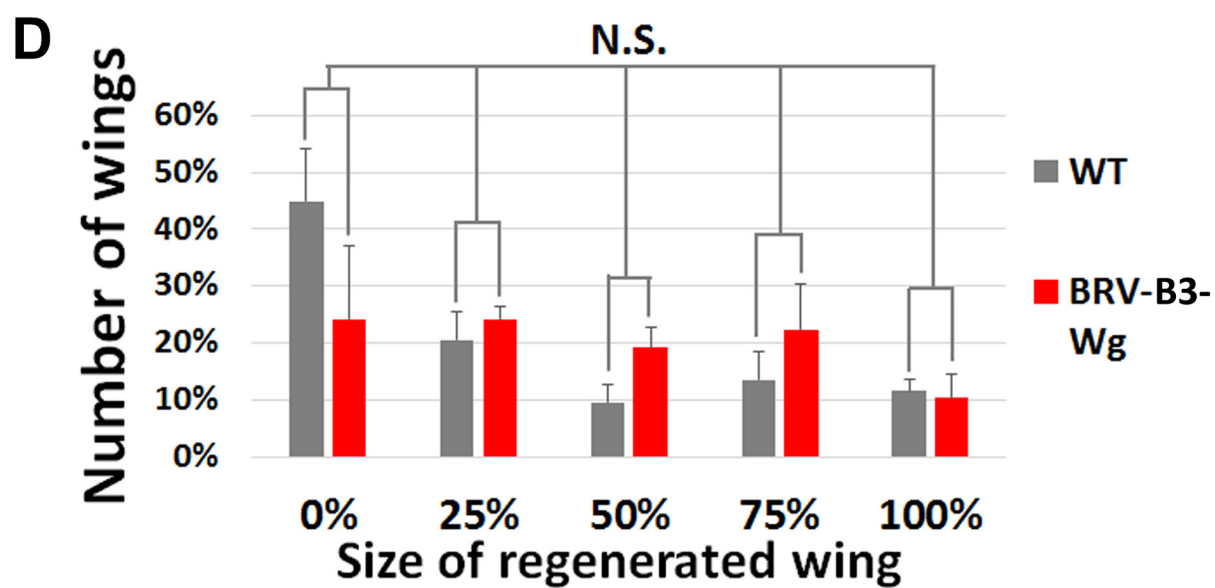

Supplement: supp [file elife-11588-supp-v1.zip]

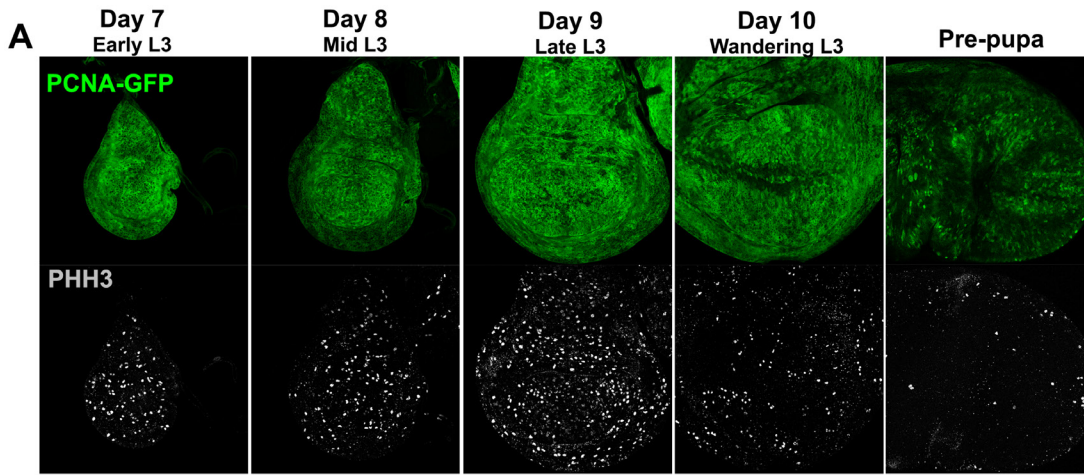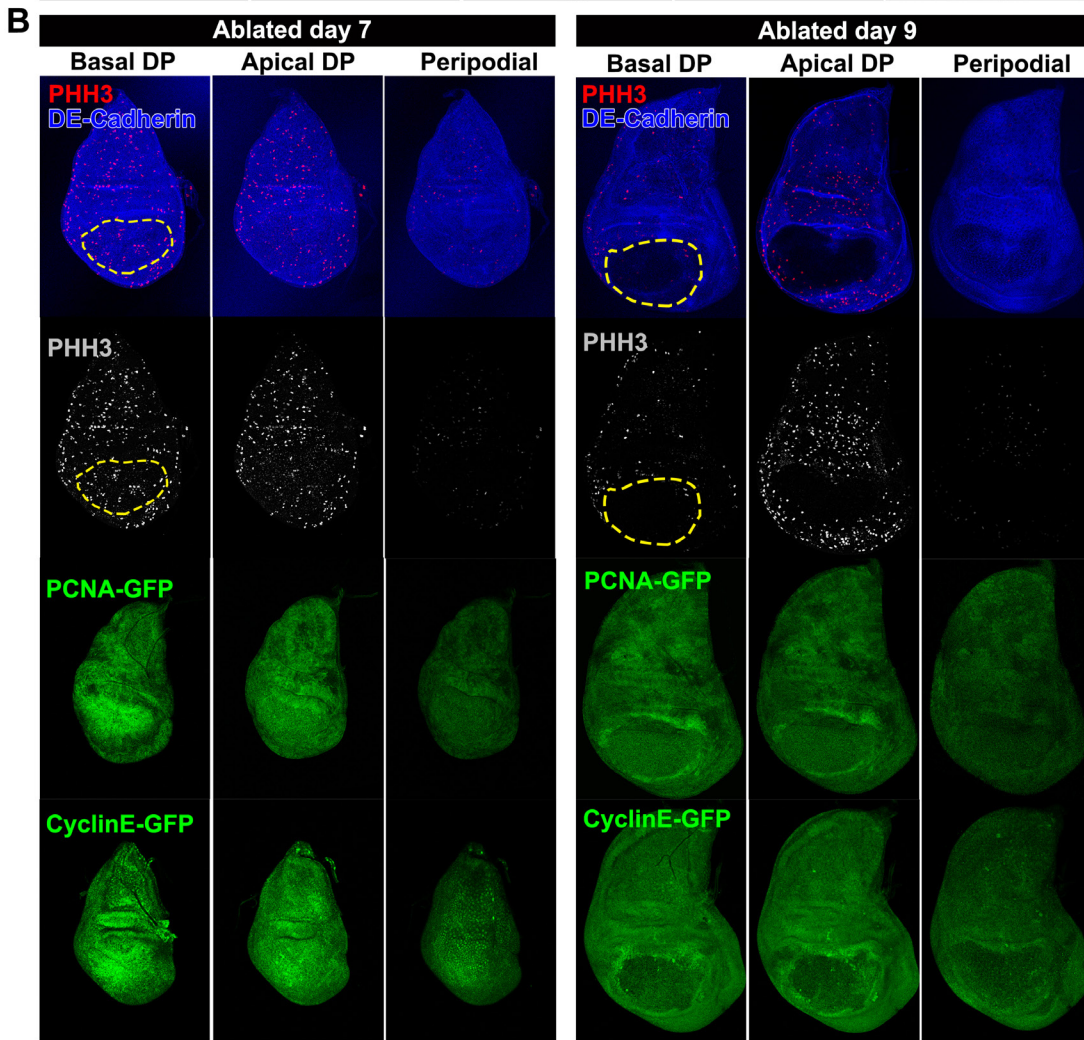

**C Relative pouch expression**

|         | Unablated | Day 7 | Day 9 |
|---------|-----------|-------|-------|
| PHH3    | ++        | ++    | +     |
| PCNA    | ++        | ++++  | ++    |
| CyclinE | ++        | ++++  | ++    |

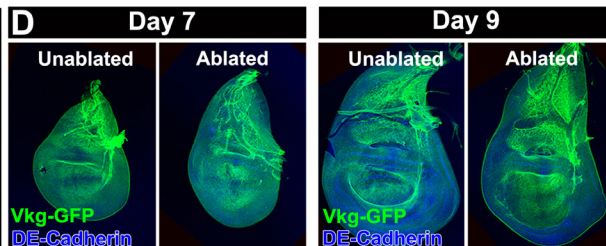

Supplement: supp [file elife-11588-supp-v1.zip]

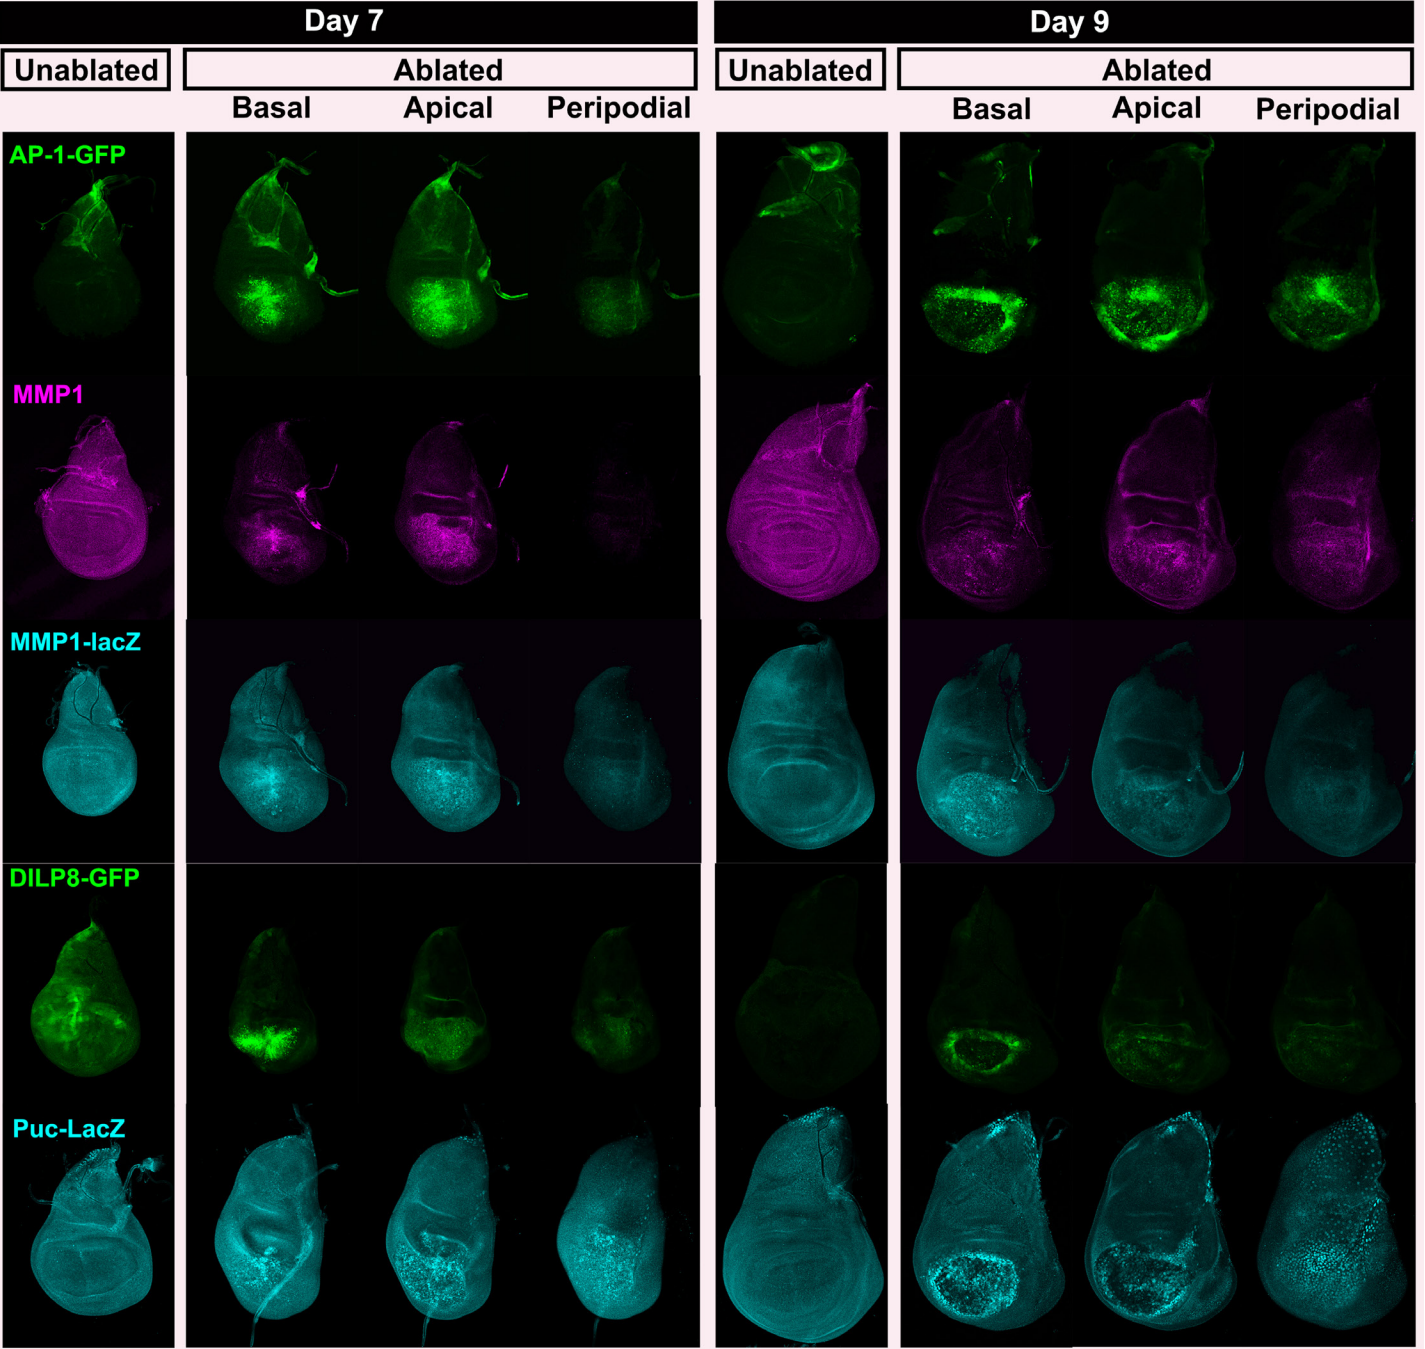

Supplement: supp [file elife-11588-supp-v1.zip]

### Day 7 ablation

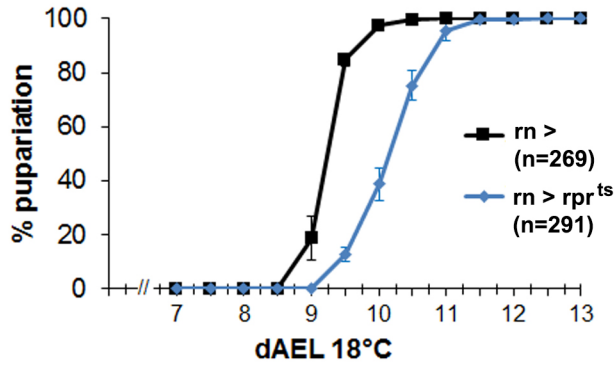

### Day 8 ablation

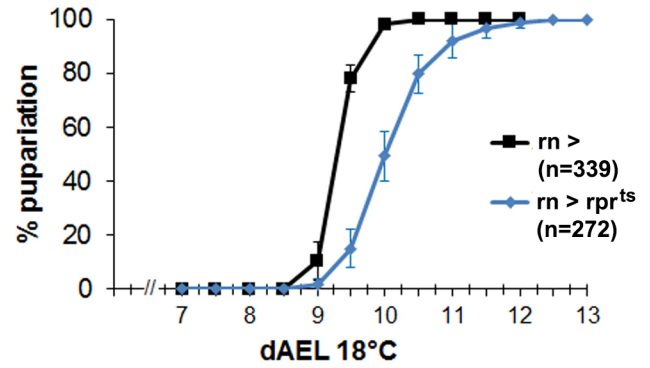

### Day 9 ablation

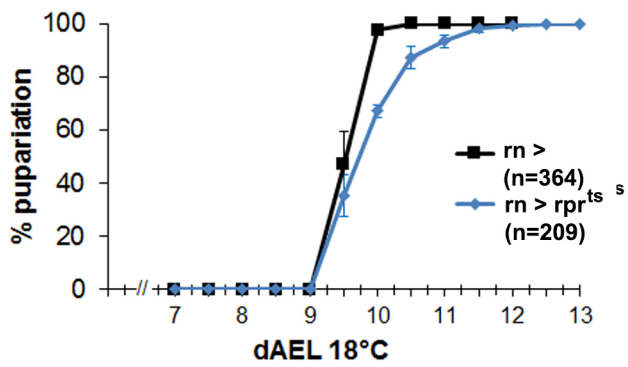

### Day 10 ablation

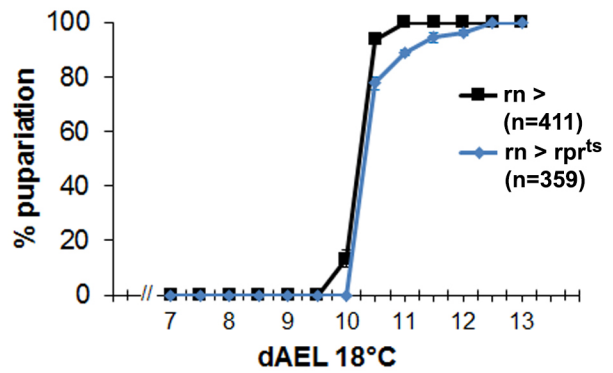

Supplement: supp [file elife-11588-supp-v1.zip]

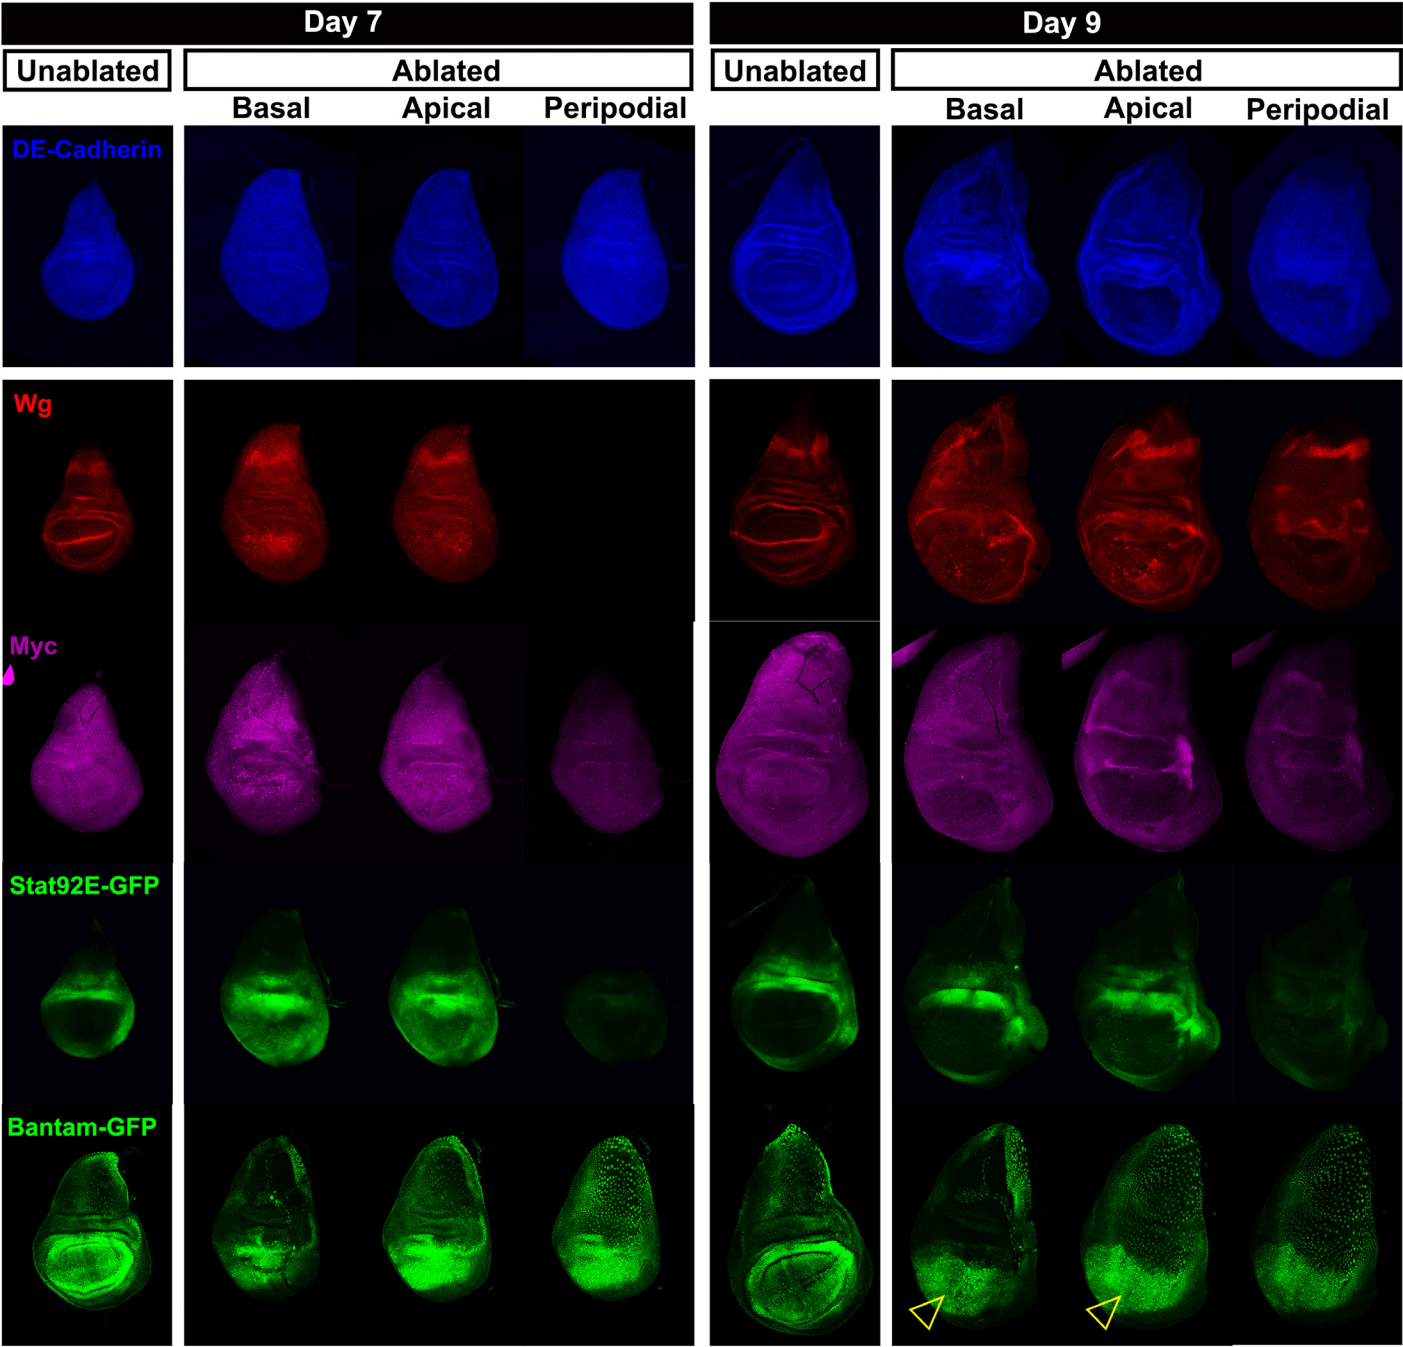

Supplement: supp [file elife-11588-supp-v1.zip]

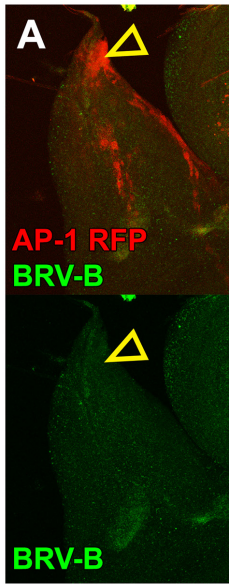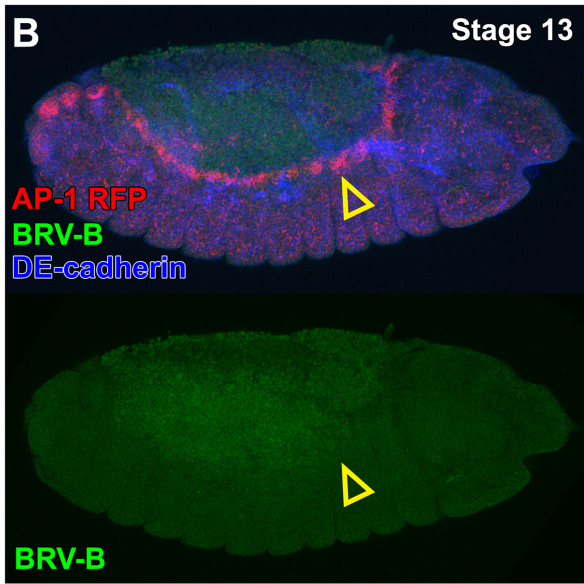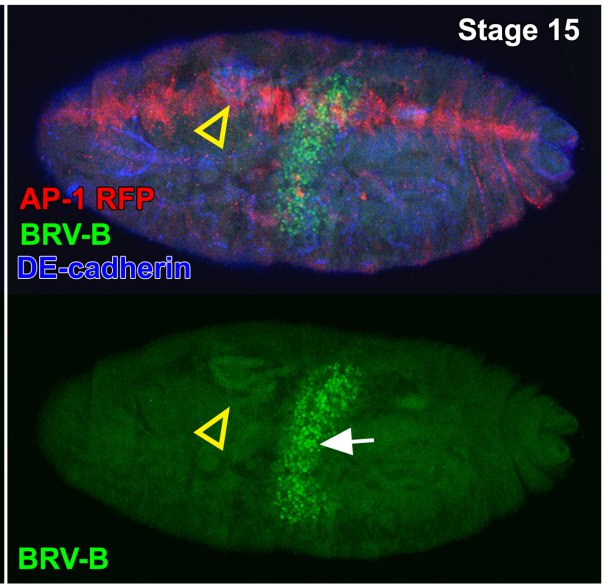

Supplement: supp [file elife-11588-supp-v1.zip]

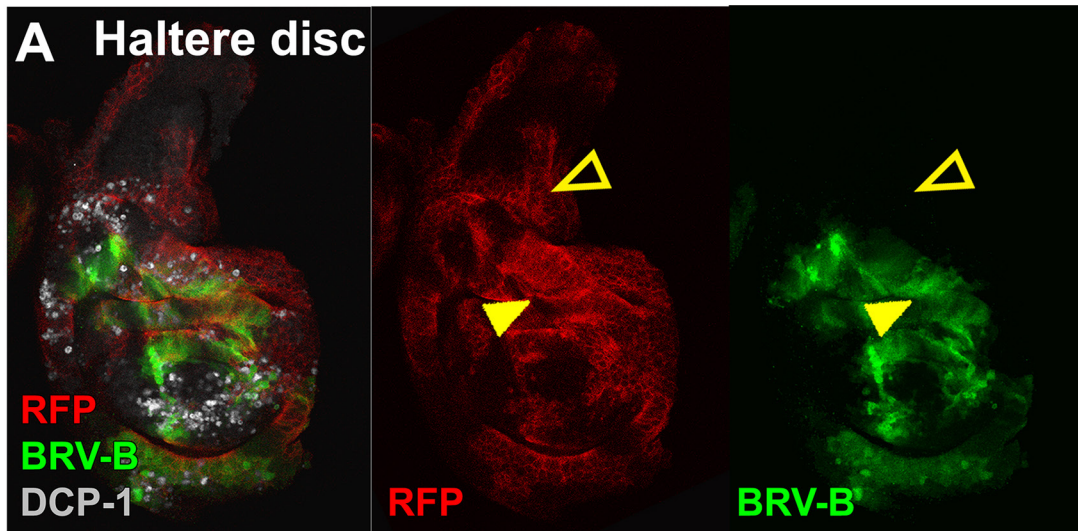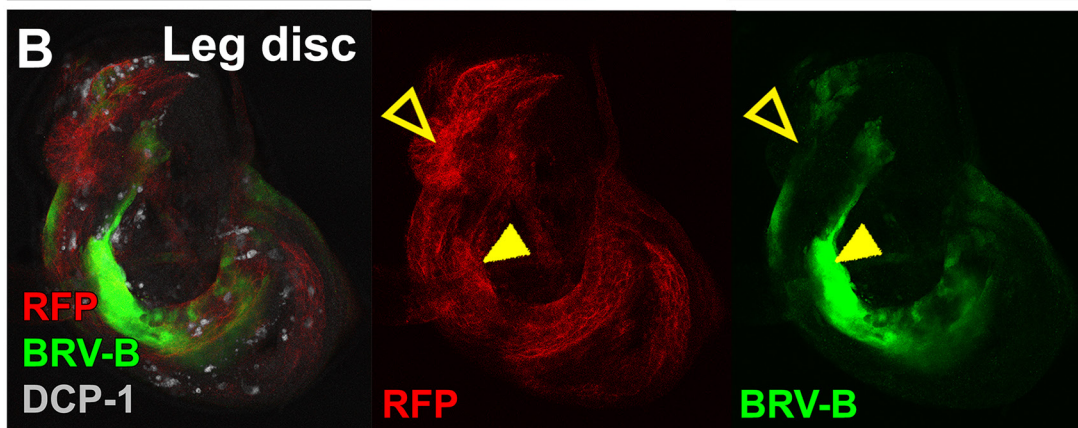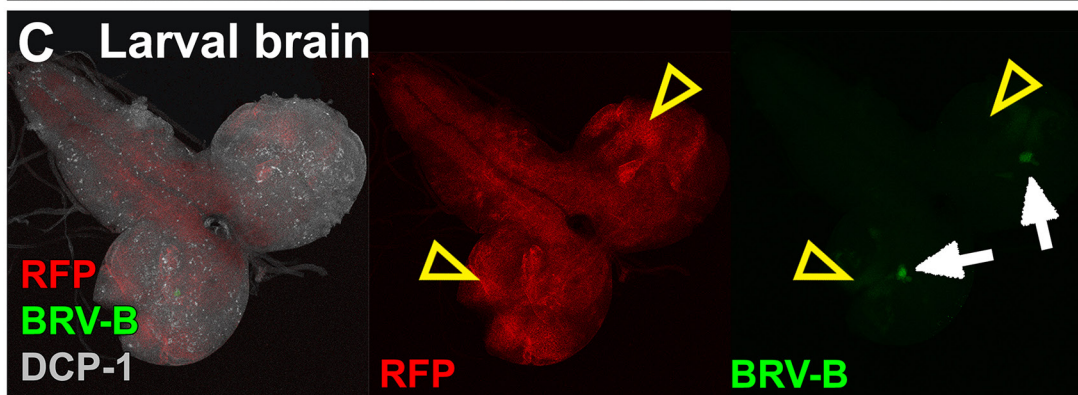

Supplement: supp [file elife-11588-supp-v1.zip]
